# Supplementary material for: Role of Genetic Variation in ABC Transporters in Breast Cancer Prognosis and Therapy Response
Source: PubMed Central journal article supplement (PMC7765380; doi:10.3390/ijms21249556), 2020-12-15

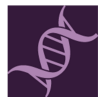

*Supplementary material*

# Role of Genetic Variation in ABC Transporters in Breast Cancer Prognosis and Therapy Response

Viktor Hlaváč<sup>1,2</sup>, Radka Václavíková<sup>1,2</sup>, Veronika Brynychová<sup>1,2</sup>, Renata Koževnikovová<sup>3</sup>, Katerina Kopečková<sup>4</sup>, David Vrána<sup>5</sup>, Jiří Gatěk<sup>6</sup> and Pavel Souček<sup>1,2,\*</sup>

<sup>1</sup> Toxicogenomics Unit, National Institute of Public Health, Prague, Czech Republic; viktor.hlavac@szu.cz (V.H.); rvaclavikova@seznam.cz (R.V.); veronikabrynychova@seznam.cz (V.B.)

<sup>2</sup> Biomedical Center, Faculty of Medicine in Pilsen, Charles University, Pilsen, Czech Republic

<sup>3</sup> Department of Oncosurgery, MEDICON, Prague, Czech Republic; renata.kozevnikovova@onko-centrum.cz (R.K.)

<sup>4</sup> Department of Oncology, Second Faculty of Medicine, Charles University and Motol University Hospital, Prague, Czech Republic; katerina.kopeckova@fnmotol.cz (K.K.)

<sup>5</sup> Department of Oncology, Palacky University Medical School and Teaching Hospital, Olomouc, Czech Republic; davvrana@gmail.com (D.V.)

<sup>6</sup> Department of Surgery, EUC Hospital and University of Tomas Bata in Zlin, Zlin, Czech Republic; gatekj@gmail.com (J.G.)

\* Correspondence: pavel.soucek@szu.cz; Tel.: +420-267-082-711, ORCID: 0000-0002-4294-6799

Received: date; Accepted: date; Published: date

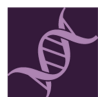

**Supplementary Table S1.** Clinical data of patient in the testing set.

| <b>Characteristics</b>                                                 | <b>Patients, N (%)<sup>1</sup></b> |
|------------------------------------------------------------------------|------------------------------------|
| Age at diagnosis, mean $\pm$ S.D. <sup>2</sup> (years)                 | 51.7 $\pm$ 9.4                     |
| <i>Menopausal status</i>                                               |                                    |
| Premenopausal                                                          | 46 (46)                            |
| Postmenopausal                                                         | 55 (55)                            |
| Missing data                                                           | 4                                  |
| <i>Tumor size (pT)</i>                                                 |                                    |
| pTis                                                                   | 8 (8)                              |
| pT1                                                                    | 50 (48)                            |
| pT2                                                                    | 40 (39)                            |
| pT3                                                                    | 5 (5)                              |
| pTX                                                                    | 2                                  |
| <i>Lymph node metastasis (pN)</i>                                      |                                    |
| Absent (pN0)                                                           | 68 (65)                            |
| Present (pN1-3)                                                        | 37 (35)                            |
| <i>Pathological stage</i>                                              |                                    |
| SI                                                                     | 46 (44)                            |
| SII                                                                    | 47 (45)                            |
| SIII                                                                   | 12 (11)                            |
| <i>Histological type</i>                                               |                                    |
| Invasive ductal carcinoma                                              | 88 (84)                            |
| Other type                                                             | 17 (16) <sup>4</sup>               |
| <i>Pathological grade</i>                                              |                                    |
| G1                                                                     | 11 (11)                            |
| G2                                                                     | 35 (35)                            |
| G3                                                                     | 54 (54)                            |
| GX                                                                     | 5                                  |
| <i>Estrogen receptor status</i>                                        |                                    |
| Positive                                                               | 38 (38)                            |
| Negative                                                               | 61 (62)                            |
| Missing data                                                           | 6                                  |
| <i>Progesterone receptor status</i>                                    |                                    |
| Positive                                                               | 39 (39)                            |
| Negative                                                               | 60 (61)                            |
| Missing data                                                           | 6                                  |
| <i>Expression of HER2</i>                                              |                                    |
| Positive                                                               | 2 (2)                              |
| Negative                                                               | 97 (97)                            |
| Missing data                                                           | 6                                  |
| <i>Expression of Ki-67, mean <math>\pm</math> S.D.<sup>2</sup> (%)</i> | 32.9 $\pm$ 20.3                    |



**Supplementary Table S1.** Clinical data of patient in the testing set. (Cont.).

| <b>Characteristics</b>                           | <b>Patients, N (%)<sup>1</sup></b> |
|--------------------------------------------------|------------------------------------|
| <i>Molecular subtype</i>                         |                                    |
| Luminal A                                        | 11 (11)                            |
| Luminal B                                        | 30 (30)                            |
| Triple negative                                  | 58 (59)                            |
| Missing data                                     | 6                                  |
| <i>Response to neoadjuvant cytotoxic therapy</i> |                                    |
| Complete or partial response                     | 47 (69)                            |
| Stable disease or progression                    | 21 (31)                            |
| Not applicable <sup>3</sup>                      | 37                                 |

Footnotes:

<sup>1</sup> Number of patients with % in parentheses

<sup>2</sup> S.D.=standard deviation

<sup>3</sup> Patients treated with adjuvant therapy without neoadjuvant cytotoxic therapy

<sup>4</sup> Six lobular, six medullary, two metaplastic, one mucinous, one papillary, and one neuroendocrine invasive carcinomas

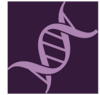

**Supplementary Table S2.** Prioritized variants for the validation phase.

| Gene          | HGVS coding (GRCh38)                  | HGVS protein        | Classification <sup>1</sup> | Rs ID <sup>2</sup>     | Response <sup>3</sup> | DFS <sup>3</sup>  | MAF <sup>4</sup> | GnomAD <sup>5</sup> |
|---------------|---------------------------------------|---------------------|-----------------------------|------------------------|-----------------------|-------------------|------------------|---------------------|
| <i>ABCA1</i>  | NC_000009.12:g.104781418_104781420del | —                   | 3'UTR                       | rs41474449             | NS                    | 0.049             | 0.07             | 0.08                |
| <i>ABCA4</i>  | NC_000001.11:g.94011139C>T            | —                   | intron                      | rs2065711              | 0.010                 | NS                | 0.20             | 0.25                |
| <i>ABCA4</i>  | NC_000001.11:g.94008629A>C            | —                   | intron                      | rs2275032              | 0.008                 | NS                | 0.14             | 0.18                |
| <i>ABCA4</i>  | NC_000001.11:g.94014481C>T            | —                   | intron                      | rs2275033              | NS                    | 0.040             | 0.40             | 0.43                |
| <i>ABCA4</i>  | NC_000001.11:g.94045977G>A            | —                   | intron                      | rs3789398              | 0.015                 | NS                | 0.35             | 0.33                |
| <i>ABCA4</i>  | NC_000001.11:g.94010999G>A            | —                   | intron                      | rs537831               | 0.018                 | NS                | 0.31             | 0.29                |
| <i>ABCA5</i>  | NC_000017.11:g.69249800G>A            | —                   | intron                      | rs1420904              | 0.047                 | NS                | 0.08             | 0.10                |
| <i>ABCA5</i>  | NC_000017.11:g.69249759T>C            | —                   | intron                      | rs2067851              | NS                    | 0.020             | 0.07             | 0.09                |
| <i>ABCA7</i>  | NC_000019.10:g.1051139_1051140TG[1]   | —                   | intron                      | rs9282562              | NS                    | 0.040             | 0.14             | 0.11                |
| <i>ABCA8</i>  | NC_000017.11:g.68929782C>T            | —                   | intron                      | rs4147976              | NS                    | 0.049             | 0.35             | 0.42                |
| <i>ABCA9</i>  | NC_000017.11:g.69061147T>C            | —                   | intron                      | rs11871944             | 0.021                 | NS                | 0.40             | 0.37                |
| <i>ABCA9</i>  | NC_000017.11:g.68989851T>G            | <b>p.Lys1306Thr</b> | <b>missense</b>             | rs2302294              | NS                    | 0.030             | 0.34             | 0.35                |
| <i>ABCA12</i> | NC_000002.12:g.214989432C>T           | —                   | synonymous                  | rs71428357             | 0.014                 | NS                | 0.08             | 0.05                |
| <i>ABCA13</i> | NC_000007.14:g.48389118A>T            | <b>p.Tyr3851Phe</b> | <b>missense</b>             | rs17132289             | NS                    | 0.030             | 0.08             | 0.07                |
| <i>ABCA13</i> | NC_000007.14:g.48410560T>C            | —                   | synonymous                  | rs17548783             | NS                    | 0.040             | 0.49             | 0.48                |
| <i>ABCA13</i> | NC_000007.14:g.48198124G>C            | —                   | intron                      | rs28637820             | 0.029                 | NS                | 0.13             | 0.13                |
| <i>ABCA13</i> | NC_000007.14:g.48276333G>C            | <b>p.Ala2223Pro</b> | <b>missense</b>             | rs74859514             | NS                    | <0.001            | 0.08             | 0.09                |
| <i>ABCA13</i> | NC_000007.14:g.48392165C>T            | —                   | intron                      | rs7780299              | NS                    | 0.010             | 0.12             | 0.14                |
| <i>ABCB1</i>  | NC_000007.14:g.87600124T>C            | <b>p.Asn21Asp</b>   | <b>missense</b>             | rs9282564              | NS                    | 0.030             | 0.13             | 0.11                |
| <i>ABCB5</i>  | NC_000007.14:g.20700049G>A            | —                   | intron                      | rs12700230             | 0.008                 | NS                | 0.23             | 0.23                |
| <i>ABCB5</i>  | NC_000007.14:g.20661065A>T            | —                   | intron                      | rs2893007 <sup>6</sup> | NS                    | 0.03 <sup>6</sup> | 0.10             | 0.08                |
| <i>ABCB5</i>  | NC_000007.14:g.20756864G>A            | —                   | 3'UTR                       | rs3210441              | 0.037                 | NS                | 0.44             | 0.36                |
| <i>ABCB8</i>  | NC_000007.14:g.151028635A>C           | —                   | intron                      | rs2303922              | NS                    | 0.049             | 0.34             | 0.36                |
| <i>ABCB11</i> | NC_000002.12:g.168958145G>A           | —                   | intron                      | rs853772               | 0.034                 | NS                | 0.25             | 0.48                |
| <i>ABCC1</i>  | NC_000016.10:g.16138351del            | —                   | intron                      | rs4148379              | NS                    | 0.049             | 0.20             | 0.22                |
| <i>ABCC2</i>  | NC_000010.11:g.99804058G>A            | <b>p.Val417Ile</b>  | <b>missense</b>             | rs2273697              | 0.031                 | NS                | 0.22             | 0.20                |



**Supplementary Table S2.** Prioritized variants for the validation phase. (Cont.)

| Gene   | HGVS coding (GRCh38)        | HGVS protein       | Classification <sup>1</sup> | Rs ID <sup>2</sup> | Response <sup>3</sup> | DFS <sup>3</sup> | MAF <sup>4</sup> | GnomAD <sup>5</sup> |
|--------|-----------------------------|--------------------|-----------------------------|--------------------|-----------------------|------------------|------------------|---------------------|
| ABCC3  | NC_000017.11:g.50635344G>A  | —                  | intron                      | rs12604031         | 0.034                 | NS               | 0.44             | 0.40                |
| ABCC3  | NC_000017.11:g.50676161C>T  | —                  | intron                      | rs8077268          | NS                    | 0.020            | 0.10             | 0.11                |
| ABCC4  | NC_000013.11:g.95206724T>C  | —                  | synonymous                  | rs2274405          | NS                    | 0.030            | 0.37             | 0.34                |
| ABCC4  | NC_000013.11:g.95209550A>G  | —                  | synonymous                  | rs899494           | NS                    | 0.030            | 0.12             | 0.14                |
| ABCC5  | NC_000003.12:g.184000591A>G | —                  | intron                      | rs12638017         | NS                    | 0.010            | 0.06             | 0.07                |
| ABCC5  | NC_000003.12:g.183967461T>C | —                  | intron                      | rs4148579          | 0.044                 | NS               | 0.43             | 0.46                |
| ABCC8  | NC_000011.10:g.17395957A>G  | —                  | intron                      | rs739689           | 0.041                 | NS               | 0.40             | 0.35                |
| ABCC10 | NC_000006.12:g.43427363G>A  | —                  | upstream                    | rs75320251         | 0.045                 | NS               | 0.09             | 0.11                |
| ABCC11 | NC_000016.10:g.48224287C>T  | <b>p.Gly180Arg</b> | <b>missense</b>             | rs17822931         | 0.047                 | NS               | 0.14             | 0.13                |
| ABCC13 | NC_000021.9:g.14279748A>G   | —                  | intron                      | rs2254297          | NS                    | 0.049            | 0.40             | 0.43                |
| ABCC13 | NC_000021.9:g.14337293T>G   | —                  | intron                      | rs2822582          | NS                    | 0.020            | 0.40             | 0.37                |
| ABCD4  | NC_000014.9:g.74299377T>C   | —                  | intron                      | rs2301346          | 0.012                 | NS               | 0.32             | 0.30                |
| ABCD4  | NC_000014.9:g.74299190C>A   | —                  | intron                      | rs2301347          | 0.003                 | NS               | 0.40             | 0.37                |
| ABCF2  | NC_000007.14:g.151218016C>T | —                  | intron                      | rs79537035         | 0.032                 | NS               | 0.23             | 0.17                |
| ABCG8  | NC_000002.12:g.43874090A>G  | —                  | intron                      | rs34198326         | NS                    | 0.040            | 0.06             | 0.07                |
| ABCG8  | NC_000002.12:g.43852262G>A  | —                  | intron                      | rs56260466         | NS                    | 0.049            | 0.06             | 0.06                |
| CFTR   | NC_000007.14:g.117559403A>G | —                  | intron                      | rs34855237         | NS                    | 0.03             | 0.08             | 0.21                |

Footnotes:

<sup>1</sup> Classification in Annovar

<sup>2</sup> SNV number in dbSNP (<https://www.ncbi.nlm.nih.gov/snp/>)

<sup>3</sup> p-value provided for clinical associations; NS = non-significant

<sup>4</sup> MAF = minor allele frequency in the testing set

<sup>5</sup> The Genome Aggregation Database (gnomAD), allelic frequencies in European non-Finnish population

<sup>6</sup> Variant replacing failed rs11764054 based on tagging analysis; rs11764054 associated with DFS (p = 0.030)



**Supplementary Table S3.** Clinical data of patients in the validation set.

| <b>Characteristics</b>                                                  | <b>Patients, N (%)<sup>1</sup></b> |
|-------------------------------------------------------------------------|------------------------------------|
| <i>Age at diagnosis, mean <math>\pm</math> S.D.<sup>2</sup> (years)</i> | 58.9 $\pm$ 12.5                    |
| <i>Menopausal status</i>                                                |                                    |
| Premenopausal                                                           | 196 (25)                           |
| Postmenopausal                                                          | 592 (75)                           |
| Missing data                                                            | 14                                 |
| <i>Tumor size (pT)</i>                                                  |                                    |
| pTis                                                                    | 65 (8)                             |
| pT1                                                                     | 488 (62)                           |
| pT2                                                                     | 206 (27)                           |
| pT3                                                                     | 18 (2)                             |
| pT4                                                                     | 10 (1)                             |
| pTX                                                                     | 15                                 |
| <i>Lymph node metastasis (pN)</i>                                       |                                    |
| Absent (pN0)                                                            | 507 (67)                           |
| Present (pN1-3)                                                         | 252 (33)                           |
| pNX                                                                     | 43                                 |
| <i>Pathological stage</i>                                               |                                    |
| S0                                                                      | 61 (8)                             |
| SI                                                                      | 343 (46)                           |
| SII                                                                     | 282 (38)                           |
| SIII                                                                    | 64 (9)                             |
| SIV                                                                     | 1 (0)                              |
| Not determined                                                          | 51                                 |
| <i>Histological type</i>                                                |                                    |
| Invasive ductal carcinoma                                               | 596 (75)                           |
| Other type                                                              | 196 (25)                           |
| Missing data                                                            | 10                                 |
| <i>Pathological grade</i>                                               |                                    |
| G1                                                                      | 177 (23)                           |
| G2                                                                      | 382 (50)                           |
| G3                                                                      | 209 (27)                           |
| GX                                                                      | 34                                 |
| <i>Estrogen receptor status</i>                                         |                                    |
| Positive                                                                | 615 (77)                           |
| Negative                                                                | 181 (23)                           |
| Missing data                                                            | 6                                  |
| <i>Progesterone receptor status</i>                                     |                                    |
| Positive                                                                | 577 (73)                           |
| Negative                                                                | 219 (27)                           |
| Missing data                                                            | 6                                  |



**Supplementary Table S3.** Clinical data of patients in the validation set. (Cont.)

| <b>Characteristics</b>                                                 | <b>Patients, N (%)<sup>1</sup></b> |
|------------------------------------------------------------------------|------------------------------------|
| <i>Expression of HER2</i>                                              |                                    |
| Positive                                                               | 194 (24)                           |
| Negative                                                               | 600 (76)                           |
| Missing data                                                           | 8                                  |
| <i>Expression of Ki-67, mean <math>\pm</math> S.D.<sup>2</sup> (%)</i> |                                    |
|                                                                        | 23.3 $\pm$ 22.6                    |
| <i>Molecular subtype</i>                                               |                                    |
| Luminal A                                                              | 320 (40)                           |
| Luminal B                                                              | 315 (40)                           |
| Triple negative                                                        | 94 (12)                            |
| HER2                                                                   | 63 (8)                             |
| Missing data                                                           | 10                                 |
| <i>Response to neoadjuvant cytotoxic therapy</i>                       |                                    |
| Complete or partial response                                           | 127 (76)                           |
| Stable disease or progression                                          | 41 (24)                            |
| Not applicable <sup>3</sup>                                            | 634                                |

Footnotes:

<sup>1</sup> Number of patients with % in parentheses

<sup>2</sup> S.D.=standard deviation

<sup>3</sup> Patients treated with adjuvant therapy without neoadjuvant cytotoxic therapy

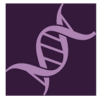

**Figure S1.** Kaplan-Meier survival plots showing significant associations of validated variants with DFS of breast patients stratified according to their molecular subtypes.

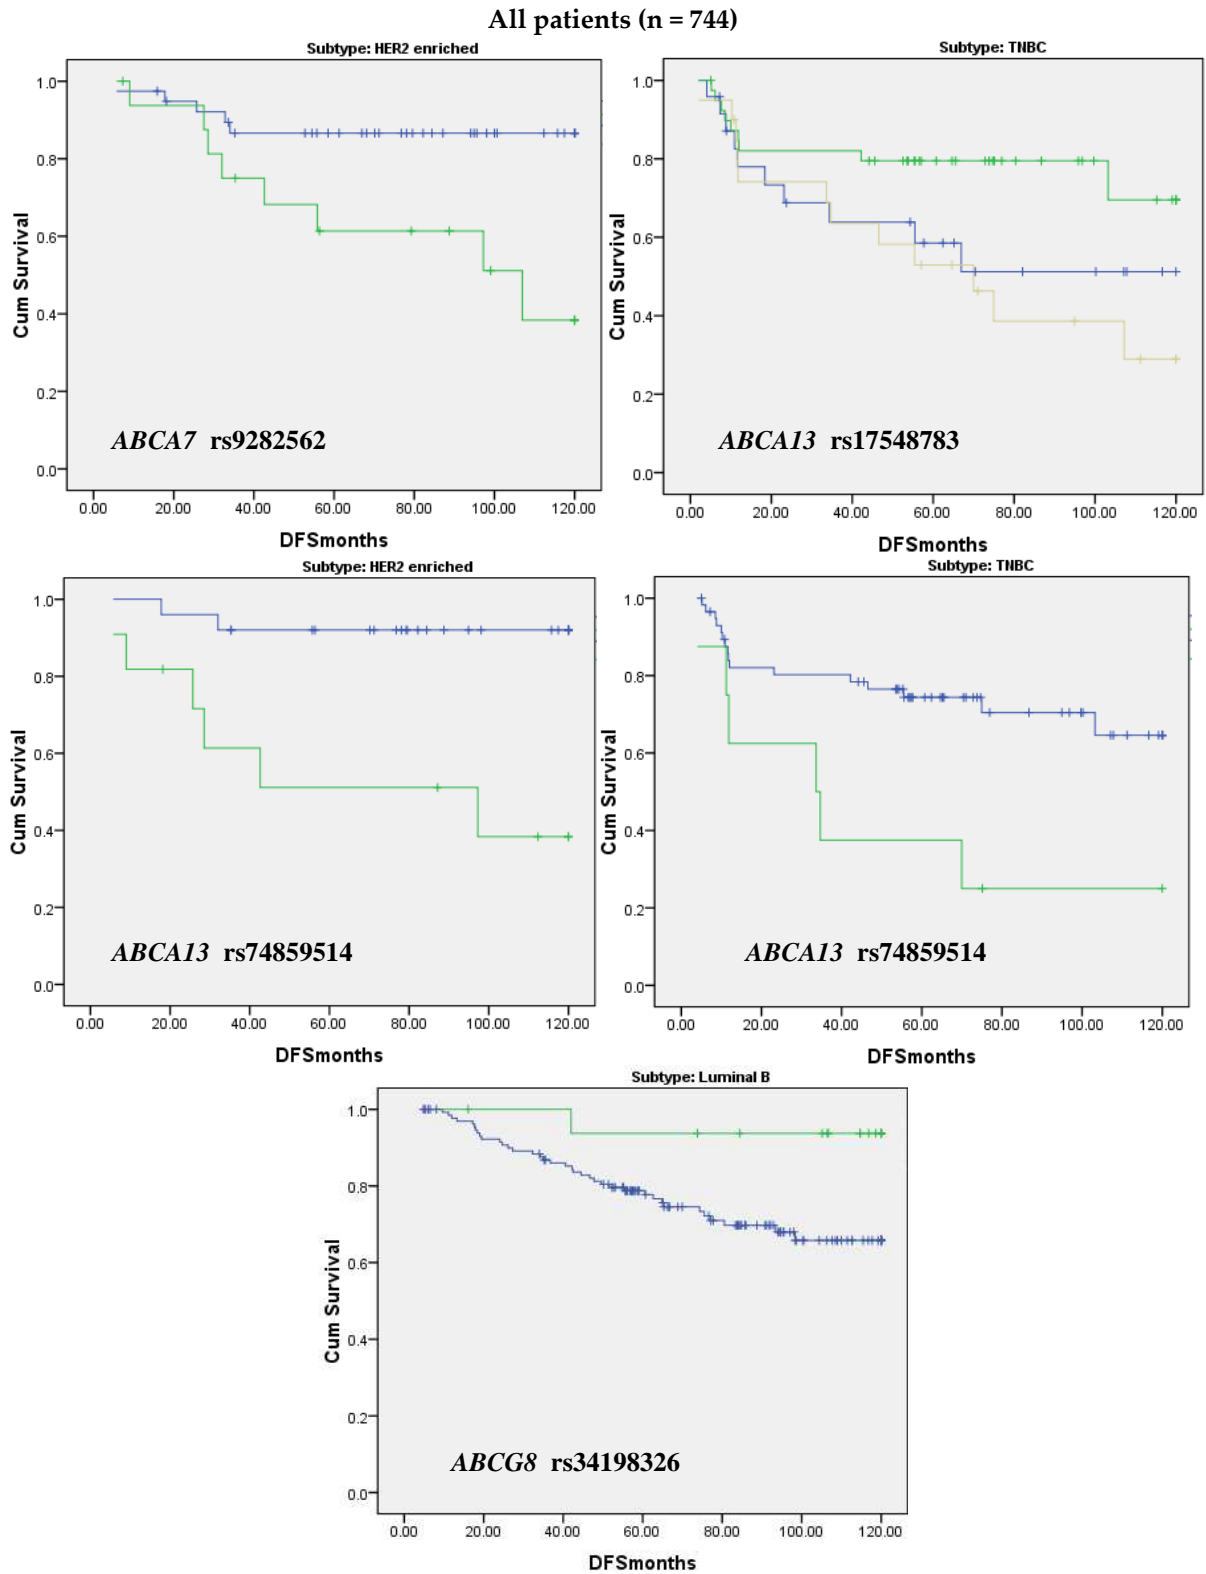

Blue line = common homozygotes; green line = heterozygotes or rare allele carriers; yellow line = rare homozygotes. For all SNPs except *ABCA13* rs17548783 recessive genetic model is displayed.



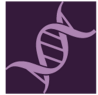

**Figure S2.** Significant associations of gene expression in healthy tissues with variants significantly associated with survival or response to cytotoxic chemotherapy – plots are derived from an eQTL analysis at GTEx portal.

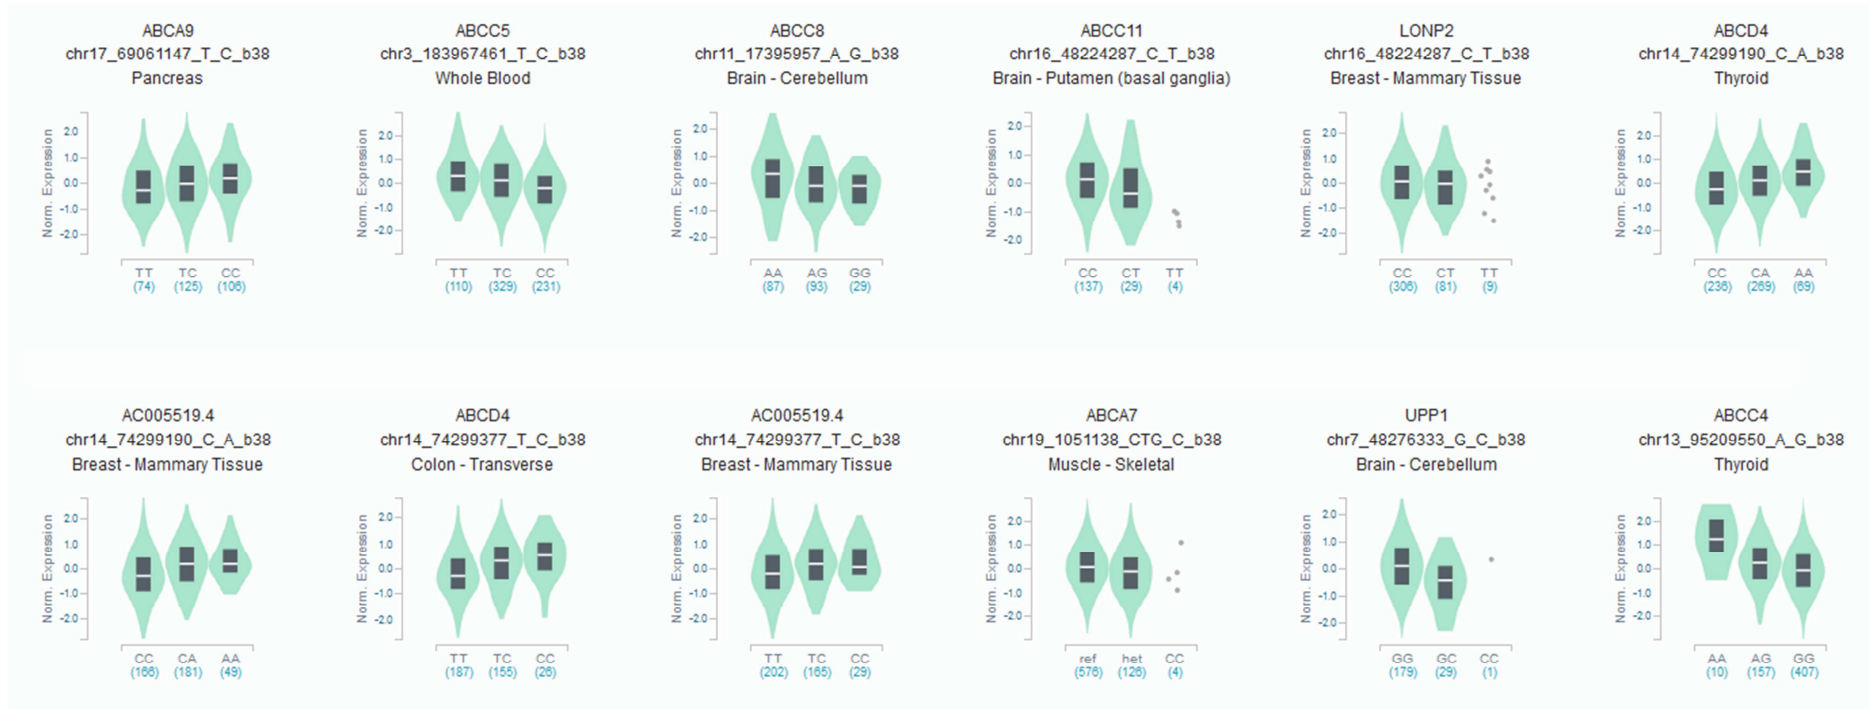

Supplement: ijms-21-09556-s001.pdf [file ijms-21-09556-s001.pdf]
